# Supplementary material
Source: PubMed Central journal article supplement (PMC1937557)

**A****Liver Nuclear Extracts 20hr Fast****Control shRNA****PGC-1 $\alpha$  shRNA****GFP****SIRT1****GFP****SIRT1**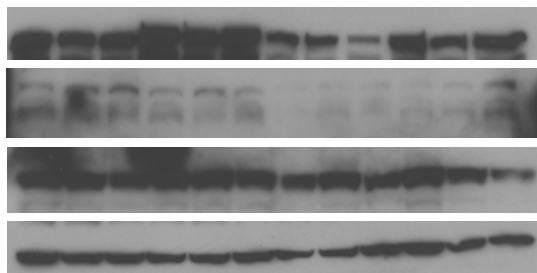**SIRT1****PGC-1 $\alpha$** **HNF-4 $\alpha$** **Actin****B****Glycemia**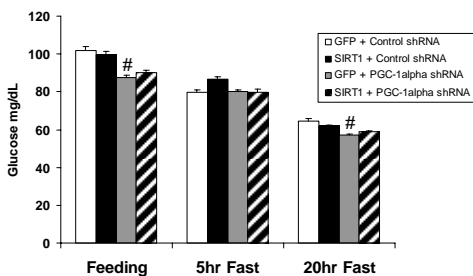**C****Glucose Tolerance Test**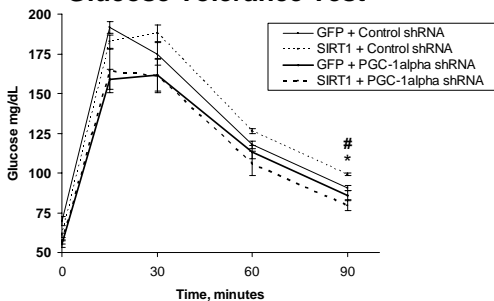

Supplement: pnas_0702509104_2.pdf [file pnas_0702509104_2.pdf]
