# Supplementary material
Source: PubMed Central journal article supplement (PMC1937557)

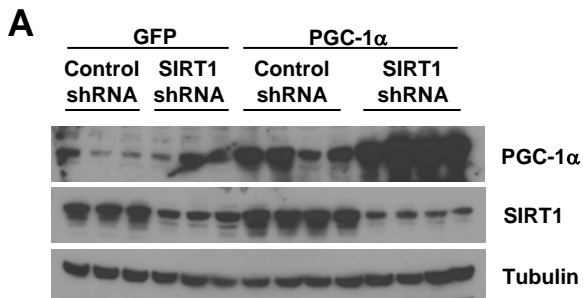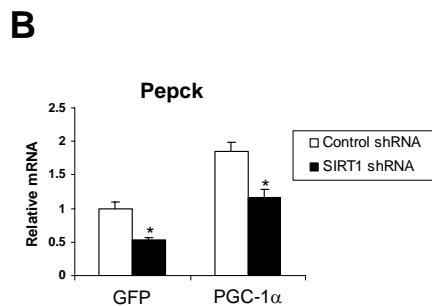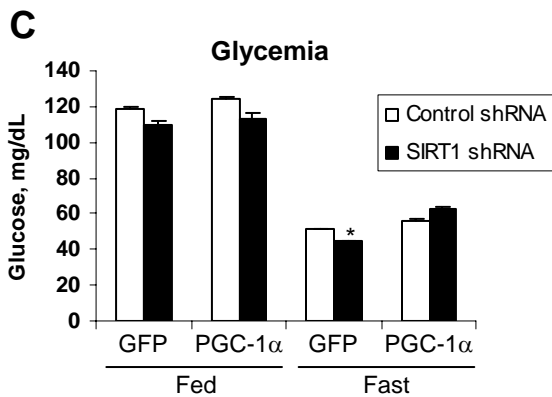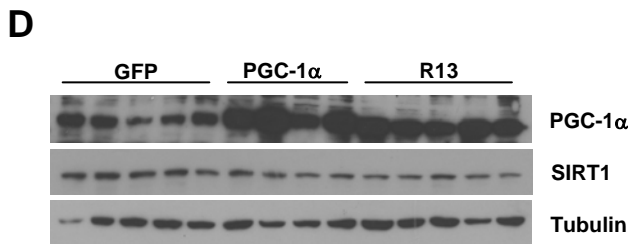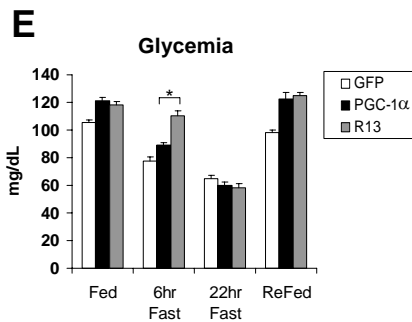

Supplement: pnas_0702509104_3.pdf [file pnas_0702509104_3.pdf]
