# Supplementary material
Source: PubMed Central journal article supplement (PMC1937557)

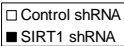

### A Serum Triglycerides

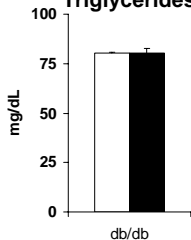

### Serum Free Fatty Acids

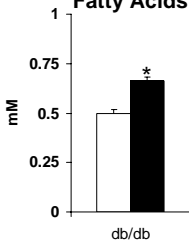

### Serum Cholesterol

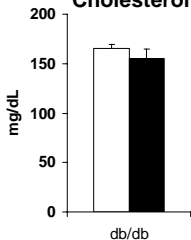

### B Liver Triglycerides

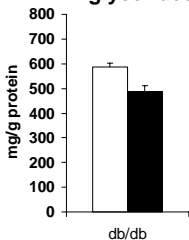

### Liver Free Fatty Acids

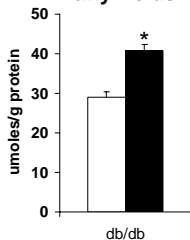

### Liver Cholesterol

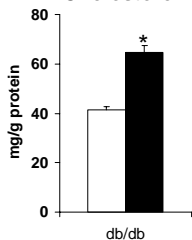

Supplement: pnas_0702509104_5.pdf [file pnas_0702509104_5.pdf]
