# Supplementary material
Source: PubMed Central journal article supplement (PMC1937557)
Supplement: pnas_0702509104_6.pdf [file pnas_0702509104_6.pdf]

# Appendix 1

## Liver nuclear extracts

### Buffer A

10mM KHEPES pH 7.9,  
10mM KCl,  
1.5mM MgCl<sub>2</sub>,  
0.5mM DTT,  
1mM PMSF,  
protease inhibitors (Roche),  
10mM Nicotinamide,  
1μM TSA,  
phosphatase inhibitors

### Buffer B

20mM KHEPES pH 7.9,  
400mM NaCl,  
1.5mM MgCl<sub>2</sub>,  
0.5mM DTT,  
0.2mM EDTA,  
1mM PMSF,  
protease inhibitors (Roche),  
10mM Nicotinamide,  
1μM TSA, and  
phosphatase inhibitors

- Incubate ~300mg pulverized liver in 1.0mL Buffer A for 20 minutes on ice
- Homogenize using a Tissue Miser (Fisher) for 10 seconds on medium speed
- spin 3 minutes 4K RPM at 4°C
- Remove supernatant
- Resuspend pellet in 200uL Buffer B
- rotate for 20 minutes at 4°C
- spin for 10 minutes at 16K RPM 4°C
- Quantitate Protein.

10μg of nuclear extract were run on SDS-PAGE and probed with antibodies: SIRT1 (Upstate), anti-PGC-1α (a generous gift from the laboratory of Marc Montminy), FOXO1 (Santa Cruz, H-128), HNF-4α (Santa Cruz, H-171), and Actin (Lab Vision).
