# Supplementary material
Source: PubMed Central journal article supplement (PMC1937557)
Supplement: pnas_0702509104_7.pdf [file pnas_0702509104_7.pdf]

## Appendix 2

### Immunoprecipitation of PGC-1 $\alpha$ and FOXO1 for acetylation.

#### Preparing mouse liver extracts

##### Buffer A

10mM KHEPES pH 7.9,  
10mM KCl,  
1.5mM MgCl<sub>2</sub>,  
0.5mM DTT,  
1mM PMSF,  
protease inhibitors (Roche),  
10mM Nicotinamide,  
1 $\mu$ M TSA,  
phosphatase inhibitors

##### RIPA Buffer

1% NP-40  
0.1% SDS  
0.5% NaDeoxycholate  
In PBS

Pulverize mouse liver on liquid nitrogen store at -80°C  
Incubate ~300mg pulverized liver in 500uL Buffer A for 20 minutes on ice.  
Homogenize tissue with Tissue Miser (Fisher) for 10 seconds on a medium speed  
Spin 3 minutes at 4K RPM  
Aspirate Supernatant and Resuspend Pellet in 300uL RIPA Buffer  
Vortex 3x 15sec  
Spin 10 minutes at 16K RPM  
Save the supernatant  
Quantitate protein

#### Immunoprecipitation.

Dilute 500ug of liver extracts with at least 3 volumes of PBS (with Nam, TSA, and protease inhibitors)  
Add anti-PGC-1 $\alpha$  (Santa Cruz, H-300, K-15, or P-19) or anti-FOXO1 (Santa Cruz, H-128) at 1:50-1:20.  
IP overnight rotating at 4°C  
Add 10uL of 50% Protein A Agarose and 10uL of 50% Protein G agarose.  
Rotate 2-4 hours at 4°C  
Wash IPs at least 3x with 500uL PBS (with Nam and TSA)  
after final wash add 100uL 2x SDS sample buffer and boil.

#### Notes.

Perform a control IP (IgG or no antibody) and an Antibody alone IP.

A positive IP control can be performed using liver extracts from mice overexpressing PGC-1a. Or by adding whole cell extracts from 293 overexpressing PGC-1a to the liver extracts-this will yield a very strong PGC-1a band on the western blot.

PGC-1a runs at ~120kDa, its best to run a 7% gel until the 120kDa is in the middle; to get good separation as sometimes there is an IgG band ~110kDa.

When western blotting for anti-acetylated lysine (Cell Signaling): block in 5% milk TBSt for 1 hour and probe overnight with anti-acetylated lysine (1:2000) in 5% BSA TBSt.
